# Supplementary material for: Puncture angle on an endoscopic ultrasound image is independently associated with unsuccessful guidewire manipulation of endoscopic ultrasound-guided hepaticogastrostomy: a retrospective study in Japan
Source: PubMed Central journal article supplement — Clin Endosc. 2024 Jul 26;57(5):656–65. doi: 10.5946/ce.2023.244 (PMC11474482; doi:10.5946/ce.2023.244), 2024-07-26
Supplement: ce-2023-244-Supplementary-Table-1.pdf [file ce-2023-244-Supplementary-Table-1.pdf]

**Supplementary Table 1.** The details of the rescue methods

| No.                                           | Rescue methods and the presence of success |                        |                     |                     | Result    |
|-----------------------------------------------|--------------------------------------------|------------------------|---------------------|---------------------|-----------|
|                                               | 1st                                        | 2nd                    | 3rd                 | 4th                 |           |
| 1                                             | Changing guidewire: no                     | Uneven method: no      | Re-puncture: no     |                     | Unsuccess |
| 2                                             | Changing guidewire: yes                    |                        |                     |                     | Success   |
| 3                                             | Changing guidewire: no                     | Uneven method: yes     |                     |                     | Success   |
| 4                                             | Liver impaction: yes                       |                        |                     |                     | Success   |
| 5                                             | Re-puncture: no                            |                        |                     |                     | Unsuccess |
| 6                                             | Changing guidewire: no                     | Uneven method: no      | Re-puncture: yes    |                     | Success   |
| 7                                             | Changing guidewire: no                     | Uneven method: yes     |                     |                     | Success   |
| 8                                             | Liver impaction: no                        | Re-puncture: yes       |                     |                     | Success   |
| 9                                             | Changing guidewire: no                     | Liver impaction: no    | Uneven method: no   | Re-puncture: yes    | Success   |
| 10                                            | Uneven method: yes                         |                        |                     |                     | Success   |
| 11                                            | Liver impaction: no                        | Uneven method: yes     |                     |                     | Success   |
| 12                                            | Liver impaction: yes                       |                        |                     |                     | Success   |
| 13                                            | Liver impaction: no                        | Re-puncture: yes       |                     |                     | Success   |
| 14                                            | Changing guidewire: no                     | Uneven method: yes     |                     |                     | Success   |
| 15                                            | Uneven method: no                          | Re-puncture: yes       |                     |                     | Success   |
| 16                                            | Liver impaction: no                        | Changing guidewire: no | Uneven method: yes  |                     | Success   |
| 17                                            | Liver impaction: no                        | Changing guidewire: no | Re-puncture: no     |                     | Unsuccess |
| 18                                            | Changing guidewire: no                     | Re-puncture: yes       |                     |                     | Success   |
| 19                                            | Liver impaction: no                        | Uneven method: no      | Balloon method: yes |                     | Success   |
| 20                                            | Changing guidewire: no                     | Liver impaction: yes   |                     |                     | Success   |
| 21                                            | Liver impaction: no                        | Uneven method: no      | Re-puncture: no     | Balloon method: yes | Success   |
| 22                                            | Changing guidewire: no                     | Uneven method: no      | Re-puncture: no     |                     | Unsuccess |
| 23                                            | Changing guidewire: no                     | Uneven method: yes     |                     |                     | Success   |
| 24                                            | Changing guidewire: no                     | Uneven method: no      | Re-puncture: yes    |                     | Success   |
| 25                                            | Changing guidewire: yes                    |                        |                     |                     | Success   |
| 26                                            | Uneven method: yes                         |                        |                     |                     | Success   |
| 27                                            | Changing guidewire: no                     | Uneven method: no      | Re-puncture: yes    |                     | Success   |
| 28                                            | Changing guidewire: no                     | Uneven method: no      | Re-puncture: yes    |                     | Success   |
| Success rate (% , <i>n</i> / total <i>n</i> ) | 21.4 (6/28)                                | 47.6 (10/21)           | 54.5 (6/11)         | 100 (2/2)           |           |
